# Supplementary material for: The role of cations in uranyl nanocluster association: a molecular dynamics study
Source: Royal Society of Chemistry journal article supplement (doi:10.1039/c9cp05138d), 2019-12-18
Supplement: c9cp05138d1.pdf [file c9cp05138d1.pdf]

# Supplementary Information for The Role of Cations in Uranyl Nanocluster Association: A Molecular Dynamics Study

Ken Newcomb,<sup>†</sup> Varinia Bernales,<sup>‡</sup> Surya Prakash Tiwari,<sup>†</sup> Laura Gagliardi,<sup>‡</sup> and  
Edward J. Maginn<sup>\*,†</sup>

<sup>†</sup>*Department of Chemical and Biomolecular Engineering, 250 Nieuwland Hall, University  
of Notre Dame, Notre Dame, IN 46556, USA.*

<sup>‡</sup>*Department of Chemistry, Minnesota Supercomputing Institute, University of Minnesota,  
Minneapolis, Minnesota 55455, United States*

E-mail: ed@nd.edu

## Uranyl Peroxide Subunit Simulations

Atomic charges for the uranyl peroxide unit can be found in Table S1 and were derived from CM5 calculations. Due to rounding error, the charges do not exactly sum to zero. GROMACS handles this by applying a uniform background charge. The LJ parameters were the same as those used for the simulation of the nanocluster. In addition, all MD simulation protocol details were kept the same. Non-bonded interactions were excluded for atoms connected by at most 3 bonds. One uranyl peroxide ion was simulated with 1000 SPC/E water molecules. The peroxide species was kept approximately rigid through use of a very stiff bond stretching, angle bending and dihedral potentials.

Table S1: Charges used in uranyl peroxide simulations, derived from CM5 calculations.

| Atom type | $[(\text{UO}_2)_2\text{O}_2]^{2+}$ |
|-----------|------------------------------------|
| U         | 2.902655                           |
| Ou        | -0.732414                          |
| Op        | -0.437646                          |

Tables S2-S7 show the QM single point energy data used to fit the LJ parameters for both the peroxide and the nanocluster. The configurations refer to those found in Figure 3 in the main text.

Table S2: QM Energy Calculations: Configuration A

| Distance (Å) | HF Energy (kJ/mol) | MP2 Energy (kJ/mol) |
|--------------|--------------------|---------------------|
| 1.0          | 75.4330            | 61.3519             |
| 1.5          | 11.9070            | 6.4712              |
| 2.0          | 3.6989             | 1.2547              |
| 2.2          | 3.2340             | 1.3776              |
| 2.4          | 3.1574             | 1.7101              |
| 2.6          | 3.2142             | 2.0557              |
| 2.8          | 3.2925             | 2.3417              |
| 3.0          | 3.3512             | 2.5538              |
| 3.5          | 3.3451             | 2.7926              |
| 4.0          | 3.1847             | 2.7722              |
| 4.5          | 2.9506             | 2.6254              |
| 5.0          | 2.6981             | 2.4348              |
| 6.0          | 2.2237             | 2.0364              |
| 7.0          | 1.8319             | 1.6911              |
| 10.0         | 1.0842             | 1.0101              |

Table S3: QM Energy Calculations: Configuration B

| Distance (Å) | HF Energy (kJ/mol) | MP2 Energy (kJ/mol) |
|--------------|--------------------|---------------------|
| 1.0          | 428.3077           | 359.3745            |
| 1.5          | 102.5708           | 76.1614             |
| 2.0          | 4.0634             | -3.9124             |
| 2.2          | -6.5949            | -11.4957            |
| 2.4          | -11.3355           | -14.3022            |
| 2.6          | -13.1380           | -14.8704            |
| 2.8          | -13.5210           | -14.4526            |
| 3.0          | -13.2334           | -13.6467            |
| 3.5          | -11.6005           | -11.3508            |
| 4.0          | -9.8819            | -9.4469             |
| 4.5          | -8.4185            | -7.9451             |
| 5.0          | -7.2172            | -6.7619             |
| 6.0          | -5.4279            | -5.0585             |
| 7.0          | -4.2056            | -3.9118             |
| 10.0         | -2.2500            | -2.0900             |

Table S4: QM Energy Calculations: Configuration C

| Distance (Å) | HF Energy (kJ/mol) | MP2 Energy (kJ/mol) |
|--------------|--------------------|---------------------|
| 1.0          | 90.7210            | 78.1486             |
| 1.5          | 18.9529            | 10.6208             |
| 2.0          | 6.2668             | 1.7233              |
| 2.2          | 4.8338             | 1.2922              |
| 2.4          | 4.0725             | 1.3078              |
| 2.6          | 3.6445             | 1.4862              |
| 2.8          | 3.3849             | 1.6973              |
| 3.0          | 3.2061             | 1.8832              |
| 3.5          | 2.9057             | 2.1744              |
| 4.0          | 2.6691             | 2.2543              |
| 4.5          | 2.4509             | 2.2147              |
| 5.0          | 2.2487             | 2.0926              |
| 6.0          | 1.8916             | 1.8123              |
| 7.0          | 1.5947             | 1.5437              |
| 10.0         | 0.9943             | 0.9588              |

Table S5: QM Energy Calculations: Configuration D

| Distance (Å) | HF Energy (kJ/mol) | MP2 Energy (kJ/mol) |
|--------------|--------------------|---------------------|
| 1.0          | 102.2088           | 85.9486             |
| 1.5          | 24.2574            | 15.0047             |
| 2.0          | 8.1254             | 3.1877              |
| 2.2          | 6.1512             | 2.3362              |
| 2.6          | 4.4062             | 2.1367              |
| 2.8          | 4.0081             | 2.2559              |
| 3.0          | 3.7389             | 2.3818              |
| 3.5          | 3.3078             | 2.5861              |
| 4.0          | 3.0051             | 2.6086              |
| 4.5          | 2.7427             | 2.5134              |
| 5.0          | 2.5017             | 2.3590              |
| 6.0          | 2.0855             | 1.9823              |
| 7.0          | 1.7459             | 1.6847              |
| 10.0         | 1.0698             | 1.0341              |

Table S6: QM Energy Calculations: Configuration E

| Distance (Å) | HF Energy (kJ/mol) | MP2 Energy (kJ/mol) |
|--------------|--------------------|---------------------|
| 1.0          | 79.7692            | 69.4484             |
| 1.5          | 14.2823            | 8.8026              |
| 2.0          | 4.6500             | 1.9744              |
| 2.2          | 3.8878             | 1.8621              |
| 2.4          | 3.6105             | 2.0412              |
| 2.6          | 3.5309             | 2.3054              |
| 2.8          | 3.5140             | 2.5434              |
| 3.0          | 3.5026             | 2.7350              |
| 3.5          | 3.4026             | 2.9490              |
| 4.0          | 3.2031             | 2.9081              |
| 4.5          | 2.9579             | 2.7525              |
| 5.0          | 2.7063             | 2.5583              |
| 6.0          | 2.2426             | 2.1425              |
| 7.0          | 1.8587             | 1.7808              |
| 10.0         | 1.1152             | 1.0677              |

Table S7: QM Energy Calculations: Configuration F

| Distance (Å) | HF Energy (kJ/mol) | MP2 Energy (kJ/mol) |
|--------------|--------------------|---------------------|
| 1.8          | -                  | 166.685             |
| 2.0          | -                  | -73.471             |
| 2.2          | -                  | -167.338            |
| 2.25         | -                  | -177.675            |
| 2.3          | -                  | -184.507            |
| 2.35         | -                  | -188.477            |
| 2.4          | -                  | -190.137            |
| 2.5          | -                  | -188.274            |
| 2.7          | -                  | -172.518            |
| 3.0          | -                  | -139.816            |
| 3.3          | -                  | -110.097            |
| 3.6          | -                  | -86.9871            |
| 4.0          | -                  | -65.2606            |
| 5.0          | -                  | -37.1026            |

RDF plots along with cumulative RDF plots of U-Ow (oxygen of water) interactions for uranyl peroxide are shown in Fig. S1. The peak of the RDF for uranyl peroxide is at 0.250 nm. Cumulative RDF plots suggest that the uranyl peroxide has four water molecules per uranium atom in their first solvation shell. A more detailed picture of solvation can be seen in the SDF plots, shown in Fig. S2. It can be seen that the U atom of uranyl peroxide is hexa-coordinated (two peroxide oxygen atoms plus four water oxygen atoms). In uranyl peroxide, the two peroxide oxygen atoms present in the vicinity of U repel the water molecules, which increases the radius of the solvation shell and allows a hexa-coordinated configuration. The results of uranyl peroxide agree well with the simulation results by Mir et al.<sup>1</sup> and experiments.<sup>2,3</sup>

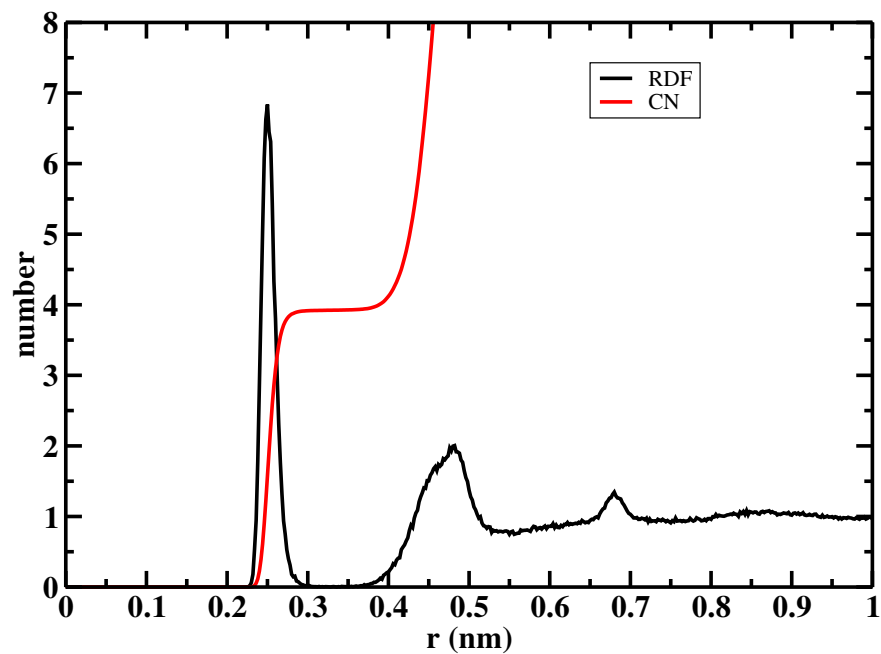

Figure S1: Radial distribution function (RDF) and cumulative RDF (CN) between U and Ow atoms for  $[(\text{UO}_2)_2\text{O}_2]^{2+}$  ion in water.

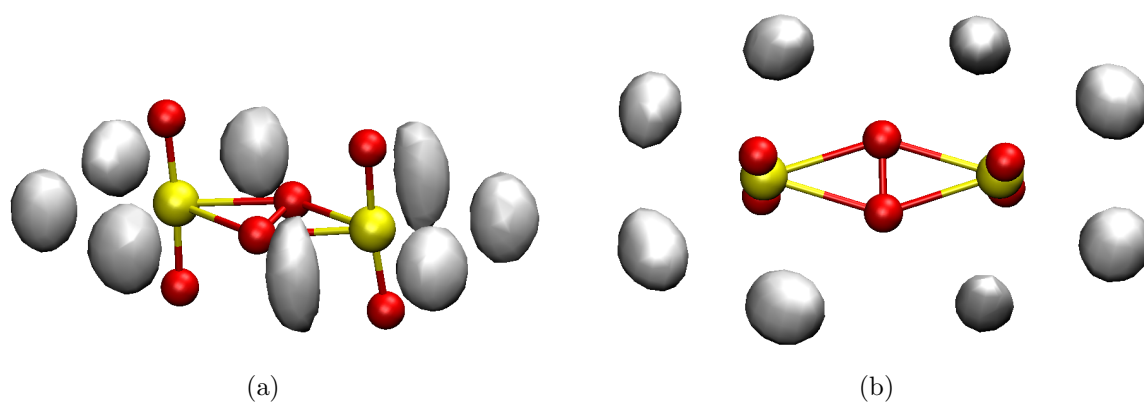

Figure S2: Spatial distribution function (SDF) of water molecules around  $[(\text{UO}_2)_2\text{O}_2]^{2+}$ . (a) Front view, (b) Top view.

# REMD Simulations

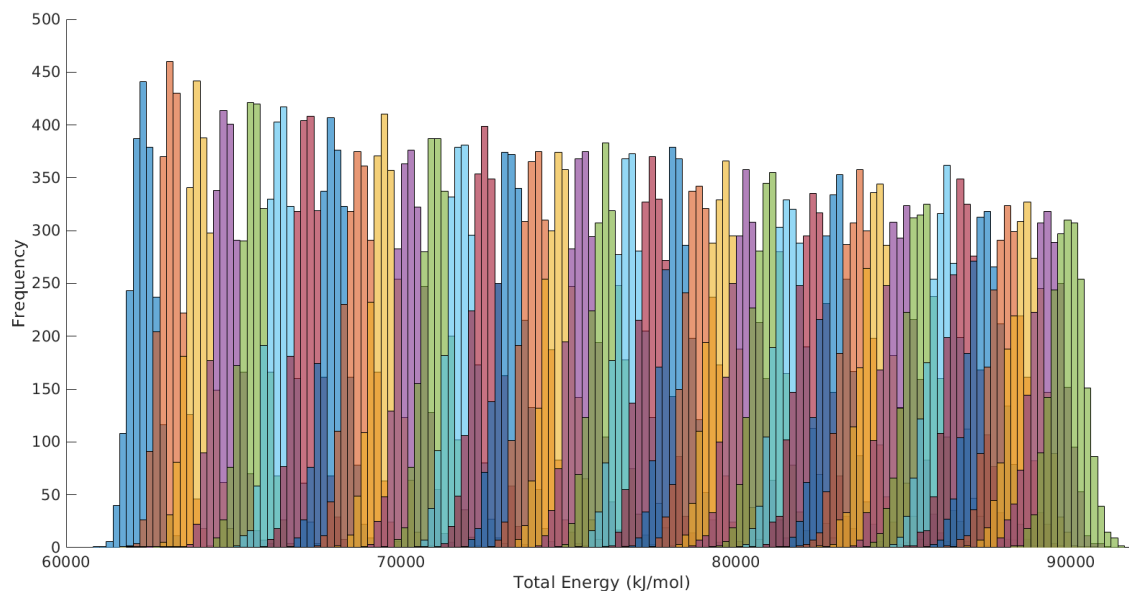

Figure S3: Energy histograms for REMD simulations. Simulations range from 298K to 500K, in increasing order from left to right.

## References

- (1) Miró, P.; Vlaisavljevich, B.; Dzubak, A. L.; Hu, S.; Burns, P. C.; Cramer, C. J.; Spezia, R.; Gagliardi, L. Uranyl–Peroxide Nanocapsules in Aqueous Solution: Force Field Development and First Applications. *J. Phys. Chem. C* **2014**, *118*, 24730–24740.
- (2) Burns, P. C.  $U^{6+}$  minerals and inorganic compounds: insights into an expanded structural hierarchy of crystal structures. *Can. Mineral.* **2005**, *43*, 1839–1894.
- (3) Sigmon, G. E.; Ling, J.; Unruh, D. K.; Moore-Shay, L.; Ward, M.; Weaver, B.; Burns, P. C. Uranyl-Peroxide Interactions Favor Nanocluster Self-Assembly. *J. Am. Chem. Soc.* **2009**, *131*, 16648–16649.
